1       **Human-induced changes in habitat preference by capybaras (*Hydrochoerus***  
2       ***hydrochaeris*) and their potential effect on zoonotic disease transmission.**

3

4       Thiago C. Dias<sup>1,2,3\*</sup>, Jared A. Stabach<sup>3</sup>, Qiongyu Huang<sup>3</sup>, Marcelo B. Labruna<sup>4</sup>, Peter  
5       Leimgruber<sup>3</sup>, Katia M. P. M. B. Ferraz<sup>5</sup>, Beatriz Lopes<sup>5</sup>, Hermes R. Luz<sup>4,6</sup>, Francisco B.  
6       Costa<sup>6,7</sup>, Hector R. Benatti<sup>4</sup>, Lucas R. Correa<sup>2</sup>, Ana M. Nieves<sup>8</sup>, Patrícia F. Monticelli<sup>8</sup>,  
7       Ubiratan Piovezan<sup>9,10</sup>, Matias P. J. Szabó<sup>11</sup>, Daniel M. Aguiar<sup>12</sup>, José Brites-Neto<sup>13</sup>,  
8       Marcio Port-Carvalho<sup>14</sup>, Vlamir J. Rocha<sup>2\*</sup>

9

10       <sup>1</sup>Universidade Federal de São Carlos, Rod. Washington Luiz, Km 235, Campus São  
11       Carlos, 13565-905, São Carlos, São Paulo, Brasil

12       <sup>2</sup>Universidade Federal de São Carlos, Rodovia Anhanguera, Km 174, Campus Araras,  
13       13604-900, Araras, São Paulo, Brasil

14       <sup>3</sup>Conservation Ecology Center, Smithsonian National Zoo & Conservation Biology  
15       Institute, Front Royal, Virginia, USA

16       <sup>4</sup>Faculdade de Medicina Veterinária e Zootecnia, Universidade de São Paulo, Av. Prof.  
17       Orlando M. de Paiva, 87, 05508-900, São Paulo, SP, Brasil

18       <sup>5</sup>Departamento de Ciências Florestais, Escola Superior de Agricultura “Luiz de Queiroz”,  
19       Universidade de São Paulo, Av. Pádua Dias, 11, 13418-900, Piracicaba, São Paulo, Brasil

20       <sup>6</sup>Departamento de Patologia, Programa de Pós Graduação em Biotecnologia do Renorbio,  
21       Ponto Focal Maranhão, Universidade Federal do Maranhão, Av. Dos Portugueses, 1966,  
22       65080-805, São Luís, MA, Brasil

23       <sup>7</sup>Departamento de Patologia, Faculdade de Medicina Veterinária, Universidade Estadual  
24       do Maranhão, Av. Lourenço Vieira da Silva, 1000, 65055-310, São Luís, MA, Brasil

25       <sup>8</sup>Faculdade de Filosofia, Ciências e Letras, Universidade de São Paulo, Av. Bandeirantes,  
26       3900, 14040-900, Ribeirão Preto, São Paulo, Brasil

27       <sup>9</sup>Embrapa Pantanal, R. 21 de Setembro, 1880, 79320-900, Corumbá, MS, Brasil

28 <sup>10</sup>Embrapa Tabuleiros Costeiros, Av. Governador Paulo Barreto de Menezes, 3250,  
29 49025-040, Aracaju, SE, Brasil

30 <sup>11</sup>Laboratório de Ixodologia, Faculdade de Medicina Veterinária, Universidade Federal  
31 de Uberlândia, Campus Umuarama, Av. Pará, 1720, 38400-902, Uberlândia, MG, Brasil

32 <sup>12</sup>Laboratório de Virologia e Rickettsioses, Hospital Veterinário, Faculdade de Medicina  
33 Veterinária, Universidade Federal do Mato Grosso, Av. Fernando Corrêa da Costa, 2367,  
34 78060-900, Cuiabá, MT, Brasil

35 <sup>13</sup>Secretaria Municipal de Saúde, Av. Bandeirantes, 2390, 13478-700, Americana, SP,  
36 Brasil

37 <sup>14</sup>Divisão de Florestas e Parques Estaduais, Instituto Florestal, R. do Horto, 931, São  
38 Paulo, SP, Brasil

39

40 \* Corresponding authors:

41 E-mail: [diasthiago93@outlook.com](mailto:diasthiago93@outlook.com) (TCD)

42 E-mail: [vlamirrocha@hotmail.com](mailto:vlamirrocha@hotmail.com) (VJR)

43

## 44 **Abstract**

45 Human activities are changing landscape structure and function globally, affecting  
46 wildlife space use, and ultimately increasing human-wildlife conflicts and zoonotic  
47 disease spread. Capybara (*Hydrochoerus hydrochaeris*) is a conflict species that has been  
48 implicated in the spread and amplification of the most lethal tick-borne disease in the  
49 world, the Brazilian spotted fever (BSF). Even though essential to understand the link  
50 between capybaras, ticks and the BSF, many knowledge gaps still exist regarding the  
51 effects of human disturbance in capybara space use. Here, we analyzed diurnal and  
52 nocturnal habitat selection strategies of capybaras across natural and human-modified

53 landscapes using resource selection functions (RSF). Selection for forested habitats was  
54 high across human-modified landscapes, mainly during day- periods. Across natural  
55 landscapes, capybaras avoided forests during both day- and night periods. Water was  
56 consistently selected across both landscapes, during day- and nighttime. This variable was  
57 also the most important in predicting capybara habitat selection across natural landscapes.  
58 Capybaras showed slightly higher preferences for areas near grasses/shrubs across natural  
59 landscapes, and this variable was the most important in predicting capybara habitat  
60 selection across human-modified landscapes. Our results demonstrate human-driven  
61 variation in habitat selection strategies by capybaras. This behavioral adjustment across  
62 human-modified landscapes may be related to BSF epidemiology.

63

## 64 **Introduction**

65 An increasing number of wild species is being forced to adapt to human-modified  
66 landscapes and to live within close proximity to humans [1, 2, 3]. Across these  
67 landscapes, human disturbance is linked to shifts in wildlife spatial ecology [4, 5, 6],  
68 ultimately affecting zoonosis spread and transmission [7, 8]. In that context, obtain  
69 accurate data to address questions on the potential effects of wild species' habitat use in  
70 zoonotic disease transmission is a challenging and crucial goal to wildlife managers and  
71 public health institutions.

72 Capybaras (*Hydrochoerus hydrochaeris*), the largest living rodents on the planet  
73 [9], have been rising in human-modified landscapes over the last few decades [10]. These  
74 semi-aquatic grazing mammals are usually found in habitats with arrangements of water  
75 sources, forest patches and open areas dominated by grasses [11, 12]. Benefited by the

76 great abundance of high-quality food resources from agricultural crops and reduced  
77 presence of large predators, capybara populations are recently experiencing a rapid grow  
78 [11, 13].

79 Over some regions, large populations of capybaras are linked to increased crop  
80 damage [14], increased vehicle collisions [15], and the spread of Brazilian spotted fever  
81 (BSF) - the most lethal spotted fever rickettsioses in the world [16]. Capybaras are  
82 responsible for maintaining and carrying large numbers of *Amblyomma sculptum* ticks,  
83 the natural reservoir and main vector of the bacterium *Rickettsia rickettsii*, the etiological  
84 agent of BSF [16]. Capybaras can also act as amplifying hosts of *R. rickettsii* among *A.*  
85 *sculptum* populations [16, 17]. Even though the role of capybaras in BSF epidemiology  
86 have been well-discussed [16, 17, 18, 19], little is known about the potential effects of  
87 human-driven variation in capybara habitat selection to BSF spread and transmission.

88 In this study, we investigated and quantified the variation in diurnal and nocturnal  
89 habitat selection strategies by GPS-tracked capybaras across natural and human-modified  
90 landscapes. We tested the predictions that: (A) as other mammals (e.g. wildebeest [5]),  
91 capybaras must show variation in habitat selection preferences across natural and human-  
92 modified landscapes due to different levels of human disturbance in these landscapes; and  
93 (B) this variation may be mainly related to temporal avoidance [20, 21] of human  
94 activities in human-modified landscapes, with capybaras increasing their selection for  
95 forests and water sources during daytime periods.

96

## 97 **Methods**

### 98 **Ethical statements**

99 Capybara field capture was authorized by the Brazilian Ministry of the Environment  
100 (permit SISBIO No. 43259-6), by the São Paulo Forestry Institute (Cotec permit 260108-  
101 000.409/2015), and approved by the Institutional Animal Care and Use Committee of the  
102 Faculty of Veterinary Medicine of the University of São Paulo (protocol 5948070314).

103

### 104 **Study Area**

105 From 2015 to 2018, we tracked 11 groups of capybaras in Brazil with Lotek Iridium  
106 Track M 2D GPS collars (Lotek Wireless, Haymarket, Ontario, CN). Of these, four  
107 groups of capybaras were tracked in natural landscapes of Mato Grosso and Mato Grosso  
108 do Sul states and seven groups across human-modified landscapes of São Paulo state (Fig  
109 1). To assess the level of human disturbance at our study sites, we incorporated the Human  
110 Footprint Index (HFI) from a previous work [22], that ranges from 0 (natural landscapes)  
111 to 50 (high-density built landscapes). The spatial resolution of the global dataset is 1-km.

112 **Fig 1. Study areas across natural and human-modified landscapes in Brazil.** Study  
113 sites in natural landscapes were located at Pantanal biome (green color) in Mato Grosso  
114 (MT) and Mato Grosso do Sul (MS) states. Across human-modified landscapes, seven  
115 study areas were located in six municipalities in São Paulo state (orange color): Ribeirão  
116 Preto, Pirassununga, Araras, Americana, Piracicaba and São Paulo (Geographic  
117 Coordinate System: WGS 84 / EPSG 4326).

118 For all study areas, we summarized the average HFI within the mean dispersal  
119 distance of capybaras from their groups (3.4 km) at each centroid [23], calculated using

120 QGIS 2.18.9 [24]. Across natural landscapes, HFI ranged from 2.4 to 6.8 ( $\bar{x}$  = 4.5; n =  
121 4), and in human-modified landscapes the index ranged from 17.4 to 37.7 ( $\bar{x}$  = 29.2; n =  
122 7). In addition, Mato Grosso and Mato Grosso do Sul states have low human population  
123 densities when compared to São Paulo state (Mato Grosso = 3 persons km<sup>-2</sup>, Mato Grosso  
124 do Sul = 7 persons km<sup>-2</sup>; São Paulo = 166 persons km<sup>-2</sup>) [25].

125 It is important to emphasize that no case of BSF has been reported in Mato Grosso  
126 and Mato Grosso do Sul states, and serological analyses of capybaras from these natural  
127 landscapes have shown no evidence of *R. rickettsii* exposure [19]. In contrast, at least  
128 three study areas of human-modified landscapes in São Paulo state were classified as  
129 BSF-endemic (municipalities of Americana, Araras and Piracicaba), with recent  
130 occurrence of human cases and serological evidence of *R. rickettsii* infection in capybaras  
131 [19].

132 Study areas in natural landscapes (São José, Ingá, Ipanema and Poconé) were  
133 located in the Pantanal biome. The Pantanal is the largest wetland in the world,  
134 characterized by a mosaic of upland vegetation and seasonally flooded areas [26, 27].  
135 This biome consists of large areas of natural vegetation and well-structured/stable  
136 ecological communities. The Pantanal support an extraordinary concentration and  
137 abundance of wildlife [28], including an impressive assemblage of medium and large  
138 carnivores [29, 30]. Within the sampled areas of Pantanal, capybaras had no access to  
139 crops or exotic grasses.

140 Unlike natural landscapes, human-modified landscapes in São Paulo state  
141 underwent significant land use and cover changes during the second half of the 19<sup>th</sup> and  
142 early 20<sup>th</sup> century, transforming natural vegetation (Atlantic rainforest and Cerrado  
143 biomes) into a mosaic comprised of small forest fragments surrounded by an agro-  
144 pastoral matrix [31]. These forest fragments likely experience large edge effects and

145 reduced biodiversity [32], which affects the abundance of medium and large carnivores  
146 across the region. Jaguar (*Panthera onca*), puma (*Puma concolor*), anacondas (*Eunectes*  
147 spp.), and caimans (*Caiman* spp.) face threats in the state according to the “São Paulo  
148 State Redbook of Fauna Threatened by Extinction” [33].

149 Across human-modified landscapes, we tracked capybaras in six municipalities:  
150 Americana, Araras, Piracicaba, Pirassununga, Ribeirão Preto and São Paulo (Fig 1). With  
151 the exception of the municipality of São Paulo, all five areas were located in agricultural  
152 landscapes. Sugar cane, corn, cultivated pasturelands, and small forest fragments were  
153 the dominant landscape components in the study sites. In Ribeirão Preto, the area used by  
154 capybaras was surrounded by a fence that prevented animals from accessing agricultural  
155 crops, but they did have access to exotic grasses, as it was also the case in the other  
156 human-modified landscapes. In São Paulo municipality, capybaras were monitored in  
157 Alberto Løfgren State Park, a protected area within a forest/urban matrix.

158

## 159 **Capybara capture and collaring**

160 In São José, Ingá and Ipanema ranches (natural landscapes), individuals were  
161 tranquilized and captured with the aid of a pneumatic rifle (Dan-Inject model JM  
162 Standard, Denmark). We used a mixture of ketamine (10 mg/kg) and xylazine (0.2 mg/kg)  
163 to anesthetize captured animals [34]. As capybaras use water [11], we targeted animals at  
164 a large distance (>20m) from this resource to reduce risk of drowning during  
165 tranquilization and capture. Across all other study areas, we captured capybaras through  
166 corral-type traps, similar to previously described trap [35].

167 To better understand movement of capybara populations and minimize the  
168 mortality risk of tracked animals, we focused GPS collaring entirely on females. Females

169 show lower agonistic interaction rates when compared to males [36] and therefore, have  
170 a decreased chance of mortality. Most female capybara are found in social groups [10,  
171 37] and are thought to be philopatric [38]. We targeted the largest females within each  
172 group for GPS collaring because there is a significant correlation between weight and  
173 hierarchical position [36]. Hence, we assumed that dominant female movement provided  
174 the best representation of group movement.

175 To avoid incorporating geolocations with large spatial errors [39], we removed GPS  
176 positions with a Dilution of Precision (DOP) > 9, following recommendations in Lotek's  
177 GPS collaring manual (Lotek Wireless, Haymarket, Ontario, CN.). The day of capture  
178 was removed from analyses to reduce bias in space use related to capture-induced stress  
179 [40]. Individuals with < 100 data points were also removed. GPS data were rarified to a  
180 4-hour time interval and categorized into diurnal and nocturnal according to sunrise and  
181 sunset time using the '*maptools*' package [41] in the R statistical environment [42].

182

## 183 **Habitat data**

184 To generate covariate data for our habitat selection analysis, we performed a  
185 supervised land cover classification using Random Forests, an ensemble learning method  
186 common for classifying satellite imagery [43]. We used multispectral high-resolution  
187 imagery (2-m resolution) acquired by the WorldView-2 satellite (DigitalGlobe, Inc.) and  
188 ancillary data derived from each satellite scene for classification (Table A in Appendix  
189 S1). We established four habitat classes across natural landscapes (forest, water,  
190 grasses/shrubs, bare soil) and five in human-modified landscapes (we added a  
191 settlements/roads class). The land cover classification was performed using the  
192 '*RStoolbox*' package [44] in the R statistical environment.



193 We digitized 1531 training polygons in QGIS 2.18.9 [24] based on visual  
194 interpretation of Worldview-2 satellite scenes. Polygons were divided into calibration  
195 (70%; used as input for the land cover classification) and validation (30%; used to  
196 evaluate the classification). Overall accuracy ranged from 0.95 to 1 in natural landscapes  
197 ( $\bar{x} = 0.97$ ;  $n = 3$ ) and from 0.84 to 0.99 in human-modified landscapes ( $\bar{x} = 0.94$ ;  $n = 6$ ).  
198 We also applied a post-classification filter to reduce ‘salt-and-pepper’ noise generated by  
199 per-pixel classifiers [45]. More details on the land cover classification can be found in  
200 Appendix S1.

201 For each study area, we calculated the Normalized Difference Vegetation Index  
202 (NDVI) [46], and created a binary classification of three habitat layers with ecological  
203 relevance to capybaras: forest, water and grasses/shrubs. Forest layers included all the  
204 types of forested vegetation, primary or secondary, native or not. Water layers included  
205 lakes, ponds, and rivers. Grasses/shrubs layers included native and exotic underbrush and  
206 shrubby vegetation, including pasturelands, and agricultural crops.

207 Using binary habitat classifications, we generated distance layers and calculated the  
208 shortest distance between each capybara tracking location and habitat classes. For forest  
209 distance calculations, we excluded 50-m from the forest edge to assess selection for areas  
210 into the forest interior and edges as well. Large double-lane highways found at some of  
211 our study sites (varying from 32 to 44 m width: Rodovia Ernesto Paterniani, Rodovia Luis  
212 de Queiroz and Rodovia Anhanguera) likely present barriers to capybara’s movement.  
213 Because tracked animals did not cross highways during our study, habitats located beyond  
214 these highways were not included in our models. Distance to forest interior, distance to  
215 water, distance to grasses/shrubs, and NDVI were used as input parameters for resource  
216 selection models.

217

## 218 **Resource selection functions**

219 We evaluated habitat selection by comparing the use and availability of habitats  
220 through a fine-scale third/fourth-order [47] resource selection function (RSF) analysis  
221 [48]. Day and nighttime periods were analyzed separately, due to recognition that  
222 capybara habitat use varies throughout the circadian cycle [49]. Habitat availability was  
223 determined using a set of random points generated within a predetermined area, as used  
224 by other colleagues [5]. We created buffers around each GPS locations with a radius equal  
225 to the maximum step length displaced by each animal over a 4-hour period.

226 To determine the appropriate number of random points per ‘use’ point (GPS  
227 location), we performed a sensitivity analysis following details described by previous  
228 works [5, 50]. We randomly selected one individual from each study area and fit multiple  
229 logistic regression models across several possibilities (1, 2, 3, 5, 10, 20, 30 and 50) of  
230 random points. We repeated the process 100 times and calculated the expectation of the  
231 coefficient estimates and the 95% simulation envelopes. We determined that a sample of  
232 30 availability points per ‘use’ point provided stable coefficient estimates (Fig A in  
233 Appendix S2). The analysis was performed in R [42].

234 We included habitat variables in our RSF after determining that they were not  
235 highly correlated (Pearson’s  $r > 0.65$ ). To facilitate comparisons across landscapes and  
236 cross-time periods, we scaled and centered all data layers ( $[x - \bar{x}]/\sigma_x$ ). We included  
237 quadratic terms for all habitat variables to test for non-linear relationships. Habitat  
238 selection was modeled applying a generalized linear mixed-effects logistic regression,  
239 following the equation:

$$240 \quad \omega(x_i) = \exp(\beta + \beta_1 x_{1i} + \dots + \beta_n x_{ni} + \gamma_i) \quad (1)$$

241 Where  $\omega(x_i)$  is the RSF,  $\beta_n$  is the coefficient for the  $n$ th predictor habitat variable  
242  $x_n$ , and  $\gamma$  is the random intercept for the animal  $i$ . We incorporated random effects into  
243 the model structure to better account for differences between individuals, while also  
244 accounting for unbalanced sampling designs [51]. We used nested random effects  
245 (“individual” inside “study area” inside “landscape”) to evaluate landscape-level  
246 coefficients. A hierarchical approach was used to account for non-independence between  
247 individual movements [5]. Habitat selection was modelled using the ‘*lme4*’ package [52].

248

## 249 **Models**

250 We created four candidate models (forest, water, open areas and full) for each  
251 landscape and time-period (Table 1) and used Akaike’s Information Criterion (AIC) to  
252 rank them [53]. Models were created to evaluate the importance of different resources on  
253 capybara habitat selection: (1) forest - providing shelter from daytime heat and a resting  
254 place during the night [26]; (2) water - used by capybaras for thermoregulation, mating  
255 and as a refuge from predator attacks [11]; and (3) open areas - used for grazing to meet  
256 energy demands [49]. A fourth model, inclusive of all variables, was tested to evaluate if  
257 a combination of factors most influenced capybara habitat selection.

258 **Table 1. Model structure and number of input variables (K).**

| <i>Model</i> | <i>Structure</i>                                                         | <i>K</i> |
|--------------|--------------------------------------------------------------------------|----------|
| Null         | -                                                                        | 3        |
| Forest       | Distance to forest interior + (Distance to forest interior) <sup>2</sup> | 5        |
| Water        | Distance to water + (Distance to water) <sup>2</sup>                     | 5        |
| Open Areas   | Distance to grasses/shrubs + (distance to grasses/shrubs) <sup>2</sup>   | 5        |

$$\text{Full} \quad \text{NDVI} + (\text{NDVI})^2 + \text{Distance to forest interior} + (\text{Distance to forest interior})^2 + \text{distance to grasses/shrubs} + (\text{Distance to grasses/shrubs})^2 + \text{Distance to water} + (\text{Distance to water})^2 \quad 11$$

---

259 We compared all models to a null model using chi-squared tests in R [42].  
260 Coefficients of top-ranked models with confidence intervals that overlap zero were  
261 considered statistically insignificant. Top-ranking models were evaluated following the  
262 technique in [54], applying Spearman rank correlations between area adjusted  
263 frequencies, using presence-only validation predictions and RSF bins (Appendix S3).

264

## 265 **Results**

### 266 **Capybara capture and collaring**

267 A total of 20 capybaras were captured and fitted with GPS collars. Capybaras were  
268 monitored for 33 to 918 days ( $\bar{x} = 273$  days), with a similar number of positions collected  
269 across study areas (Table S1). Average fix success was high for both landscapes, ranging  
270 from 87% to 99% in natural landscapes ( $\bar{x} = 94\%;n = 4$ ) and from 94% to 99% in  
271 human-modified landscapes ( $\bar{x} = 98\%;n = 16$ ). Maximum distance displaced by  
272 individuals in 4-hour time interval ranged from 442-m to 1437-m across natural  
273 landscapes ( $\bar{x} = 958.2;n = 4$ ) and 268-m to 2703-m in human-modified landscapes ( $\bar{x}$   
274  $= 867.6;n = 16$ ).

275

### 276 **Natural landscapes models**

277 The full model was top-ranked across day- and nighttime periods in natural  
278 landscapes, indicating that all habitat variables were important in predicting capybara

279 habitat selection (Table 2). Cross-validation highlighted a strong fit to our data (Table A  
 280 in Appendix S3), with stronger results for daytime periods (*day average*  $r_s = 0.83$ ;  
 281 *night average*  $r_s = 0.69$ ). In natural landscapes, distance to water was the most  
 282 important variable predicting capybara habitat selection (Table 3), with higher coefficient  
 283 during nighttime periods (day:  $\beta = -1.52 \pm 0.03$ ; night:  $\beta = -1.91 \pm 0.03$ ; Table 3).  
 284 NDVI was a weak variable in predicting capybara habitat selection during day periods  
 285 and was not significant during nighttime periods (day:  $\beta = 0.21 \pm 0.02$ ; night:  $\beta =$   
 286  $0 \pm 0.02$ ; Table 3).

287 **Table 2. Model selection across natural landscapes for day- and night periods, based**  
 288 **on Akaike Information Criterion (AIC).**

| Model                             | $K$       | $AIC$          | $\Delta AIC$ | $\omega$ | $\chi^2$       |
|-----------------------------------|-----------|----------------|--------------|----------|----------------|
| <i>Natural landscapes (day)</i>   |           |                |              |          |                |
| <b>Full</b>                       | <b>11</b> | <b>25887.1</b> |              | <b>1</b> | <b>5700.4*</b> |
| Forest                            | 5         | 30365.4        | 4478.3       | 0        | 1210.1*        |
| Open Areas                        | 5         | 30982.6        | 5095.4       | 0        | 593.0*         |
| Water                             | 5         | 27147.5        | 1260.4       | 0        | 4428.1*        |
| Null                              | 3         | 31571.6        | 5684.4       | 0        |                |
| <i>Natural landscapes (night)</i> |           |                |              |          |                |
| <b>Full</b>                       | <b>11</b> | <b>23411.9</b> |              | <b>1</b> | <b>7598.6*</b> |
| Forest                            | 5         | 30073.3        | 6661.4       | 0        | 925.3*         |
| Open Areas                        | 5         | 30061.4        | 6649.5       | 0        | 937.1*         |
| Water                             | 5         | 24089.6        | 677.7        | 0        | 6908.9*        |
| Null                              | 3         | 30994.6        | 7582.6       | 0        |                |

289 Models with smaller AIC values were taken as the best to predict capybara habitat  
 290 selection. Top-ranked model is highlighted in bold. Likelihood ratio test ( $\chi^2$ ) is also  
 291 displayed in table.

292 \*p < 0.001

293 **Table 3. Capybara resource selection function coefficients ( $\beta$ ) for both day- and**  
 294 **nighttime across natural and human-modified landscapes.**

|                                | <i>Natural landscapes</i> |                     | <i>Human-modified landscapes</i> |                     |
|--------------------------------|---------------------------|---------------------|----------------------------------|---------------------|
|                                | <i>Day</i>                | <i>Night</i>        | <i>Day</i>                       | <i>Night</i>        |
| NDVI                           | <b>0.21 (0.02)</b>        | 0 (0.02)            | <b>0.32 (0.02)</b>               | 0 (0.02)            |
| (NDVI) <sup>2</sup>            | -0.01 (0.01)              | <b>-0.03 (0)</b>    | -0.01 (0.01)                     | <b>-0.15 (0.01)</b> |
| Forest Interior                | <b>-0.63 (0.04)</b>       | <b>-0.32 (0.04)</b> | <b>-0.83 (0.04)</b>              | <b>-0.08 (0.03)</b> |
| (Forest Interior) <sup>2</sup> | <b>-0.8 (0.04)</b>        | <b>-0.72 (0.04)</b> | <b>0.21 (0.01)</b>               | <b>-0.04 (0.01)</b> |
| Grasses/Shrubs                 | <b>0.21 (0.05)</b>        | 0.02 (0.04)         | <b>1.03 (0.03)</b>               | <b>0.57 (0.03)</b>  |
| (Grasses/Shrubs) <sup>2</sup>  | <b>-0.11 (0.02)</b>       | <b>-0.02 (0.01)</b> | <b>-0.36 (0.02)</b>              | <b>-0.39 (0.02)</b> |
| Water                          | <b>-1.52 (0.03)</b>       | <b>-1.91 (0.03)</b> | <b>-0.84 (0.02)</b>              | <b>-0.46 (0.02)</b> |
| (Water) <sup>2</sup>           | <b>0.32 (0.02)</b>        | <b>0.66 (0.02)</b>  | <b>0.16 (0.01)</b>               | -0.01 (0.02)        |

295 Standard errors are displayed within the parentheses; Regression coefficients ( $\beta$ ) with  
 296 confidence intervals that did not overlapped zero are highlighted in boldface.

297 Capybaras selected areas further from forest interiors in natural landscapes (Fig 2),  
 298 with highest probabilities of selection found in areas >250-m from the forest centroid  
 299 (day- and nighttime periods). Capybaras displayed strong preferences for areas near  
 300 water. This trend was consistent across day- and nighttime periods (Fig 2), with the  
 301 probability of selection declining with increasing distance. Preferences for areas near  
 302 open areas, dominated by grasses/shrubs, were also recorded, with probability of selection  
 303 decreasing sharply at short distances (Fig 3). Probability of selection by capybaras has  
 304 increased with increasing NDVI during day- and nighttime periods, although the  
 305 relatively probability of selection plateaued at a NDVI value of approximately 0.5 during  
 306 nighttime periods.

307 **Fig 2. Relative probability of selection of distance to forest interior and distance to**  
 308 **water across natural and human-modified landscapes during day- and night**  
 309 **periods.** The y axis represents the relative probability of selection, ranging from 0 to 1.

310 The x axis represents distance to the habitat. Negative values of forest graphs are related  
311 to areas into the forest interior (-50m represents areas 50m inside forest patches).

312 **Fig 3. Relative probability of selection for distance to grasses/shrubs and NDVI**  
313 **across natural landscapes and human-modified landscapes during day- and night**  
314 **periods.** The y axis represents the relative probability of selection, ranging from 0 to 1.  
315 The x axis represents the distance to grasses/shrubs or NDVI values.

316

### 317 **Human-modified landscapes models**

318 Across human-modified landscapes, the full model was also top-ranked for both  
319 day- and nighttime periods (Table 4). Models strongly fit the data in these landscapes (  
320 *day average*  $r_s = 0.89$ ; *night average*  $r_s = 0.72$ ), with weaker results found in São  
321 Paulo municipality during nighttime, where capybaras were tracked in a non-agricultural  
322 state park (Table A in Appendix S3). The most important variable in predicting capybara  
323 habitat selection for day- and nighttime periods was distance to grasses/shrubs (day:  $\beta =$   
324  $1.03 \pm 0.03$ ; night:  $\beta = 0.57 \pm 0.03$ ; Table 3). Distance to water (day:  $\beta =$   
325  $-0.84 \pm 0.02$ ; night:  $\beta = -0.46 \pm 0.02$ ; Table 3) and distance to forest interior (day:  $\beta =$   
326  $-0.83 \pm 0.04$ ; night:  $\beta = -0.08 \pm 0.03$ ; Table 3) were also significant in predicting  
327 capybara habitat selection, with stronger coefficients found for daytime periods. NDVI  
328 was a weaker variable in predicting capybara habitat selection during daytime periods,  
329 when compared to other habitat variables, and was not significant during nighttime  
330 periods (day:  $\beta = 0.32 \pm 0.02$ ; night:  $\beta = 0 \pm 0.02$ ; Table 3).

331 **Table 4. Model selection across human-modified landscapes for day- and night**  
332 **periods, based on Akaike Information Criterion (AIC).**

| Model                                    | <i>K</i>  | <i>AIC</i>     | $\Delta AIC$ | $\omega$ | $\chi^2$       |
|------------------------------------------|-----------|----------------|--------------|----------|----------------|
| <i>Human-modified landscapes (day)</i>   |           |                |              |          |                |
| <b>Full</b>                              | <b>11</b> | <b>40628.2</b> |              | <b>1</b> | <b>6678.9*</b> |
| Forest                                   | 5         | 43675.1        | 3046.9       | 0        | 3620.0*        |
| Open Areas                               | 5         | 43203.9        | 2575.7       | 0        | 4091.2*        |
| Water                                    | 5         | 45905.3        | 5277.1       | 0        | 1389.8*        |
| Null                                     | 3         | 47291.1        | 6662.9       | 0        |                |
| <i>Human-modified landscapes (night)</i> |           |                |              |          |                |
| <b>Full</b>                              | <b>11</b> | <b>44548.5</b> |              | <b>1</b> | <b>259.5*</b>  |
| Forest                                   | 5         | 45984.3        | 1435.8       | 0        | 259.5*         |
| Open Areas                               | 5         | 45396.3        | 847.8        | 0        | 847.5*         |
| Water                                    | 5         | 45571.3        | 1022.8       | 0        | 672.5*         |
| Null                                     | 3         | 46239.8        | 1691.3       | 0        |                |

333 Models with smaller AIC values were taken as the best to predict capybara habitat  
 334 selection. Top-ranked model is highlighted in bold. Likelihood ratio test ( $\chi^2$ ) is also  
 335 displayed in table.

336 \*p < 0.001

337 Contrasting to natural landscapes, capybaras across human-modified landscapes  
 338 were observed with higher preferences for forest interior areas and areas close to forests,  
 339 with probability of selection declining with increasing distance to forested habitats (Fig  
 340 2). Capybaras also showed preferences for areas near water sources, with higher selection  
 341 during the day (Fig 2). Lower preferences for areas close to grasses/shrubs were found  
 342 for human-modified landscapes when compared to natural landscapes, with selection  
 343 increasing at mid distances (125-m) and declining at larger distances (250-m; Fig 3).  
 344 Similar to natural landscapes, the relative probability of selection increased with  
 345 increasing NDVI values during daytime periods (maximum coefficients at NDVI values



346 close to 0.7). For nighttime periods, the relative probability of selection peaked at a NDVI  
347 value close to 0.5.

348

## 349 **Discussion**

350 This is the first study using GPS tracking, high-resolution imagery and resource  
351 selection functions (RSF) to analyze and quantify capybara habitat selection strategies  
352 across natural and human-modified landscapes. Capybaras strongly selected forested  
353 habitats across human-modified landscapes, which may be a direct response to human  
354 activities (e.g. agricultural machinery, people and vehicle traffic), more pronounced  
355 during day periods in open areas of our study sites. As wildlife respond to human  
356 disturbance following the same principles used by prey encountering predators [55],  
357 capybaras may increase their selection for forests during daytime to avoid contact with  
358 humans. This behavioral adaptation may be a key point in BSF epidemiology.

359 Forests are preferred ecological niche of *A. sculptum* ticks [19, 56, 57], the main  
360 vectors of the BSF agent (*R. rickettsii*) [16]. In particular, environmental tick burdens  
361 were found to be much higher across human-modified landscapes than across natural  
362 landscapes studied here [19]. Therefore, capybaras may be highly efficient hosts across  
363 human-modified landscapes, increasing their capacity in maintaining and carrying large  
364 numbers of *A. sculptum* [16, 19], due to shared preferences for forested habitats.

365 As efficient vertebrate hosts for *A. sculptum* across human-modified landscapes,  
366 capybaras are linked to BSF spread due to increased chance of infection by *R. rickettsii*  
367 and translocation of infected ticks. Capybaras are also linked to the amplification of  
368 rickettsial infection among *A. sculptum* populations, creating new cohorts of infected  
369 ticks during bacteremia periods (days or weeks), when they maintain *R. rickettsii* in their

370 bloodstream [16]. In addition, *A. sculptum* populations are not able to sustain *R. rickettsii*  
371 for successive generations without the creation of new infected cohorts via horizontal  
372 transmission through vertebrate hosts [58, 59]. Therefore, we highlight the role of  
373 capybaras selecting disturbed forest in human-modified landscapes as an important factor  
374 in BSF spread.

375 Preferences for areas nearby water sources across natural and human-modified  
376 landscapes were not surprising. Capybaras are semi-aquatic mammals and their  
377 dependence on water sources has already been well-documented, with some authors  
378 reporting these rodents hardly moving more than 500-m from water [60, 61]. However,  
379 our models highlighted that capybaras were less dependent on water sources in human-  
380 modified landscapes, which may be related to human-driven variation in one or more  
381 behaviors linked to water use: reproduction, thermoregulation, or predator avoidance  
382 [11].

383 Quality and quantity of food resources from highly nutritious agricultural and  
384 pasture fields seems to have a strong influence in habitat selection by, since  
385 grasses/shrubs was the strongest variable in our human-modified landscapes' models.  
386 Because we wanted to compare selection for similar habitats across natural and human-  
387 modified landscapes, we did not separate crops and pastures into individual habitat  
388 classes. However, in the future, more detailed habitat selection studies for capybaras  
389 might want to consider fine-scale spatiotemporal dynamics of agriculture and pasture  
390 fields in human-modified landscapes. Understanding selection for these resources, mainly  
391 sugar cane, which is linked to the BSF spread [62], may be essential to develop conflict  
392 mitigation strategies for the species.

393 Lastly, improving NDVI temporal resolution could potentially increase the link  
394 between this vegetation index and capybaras, since this variable was weak in predicting

395 capybara habitat selection. Higher temporal resolution of NDVI may allow for further  
396 investigations on the interaction between vegetation quality and capybara habitat use.

397         Increasingly, wildlife is forced to adapt to human-modified landscapes and live  
398 within proximity to humans [3]. Capybaras appear to be well adapted to anthropic  
399 environments, with increased abundance and broadened distribution in Brazil [11]. This  
400 is likely due to high availability of nutritious resources from agricultural crops and  
401 cultivated exotic grasses, and to lower predation risk in human-modified landscapes [13].  
402 The proximity between wildlife and humans has been shown to lead to increase human  
403 wildlife conflicts, including zoonotic disease transfer [8]. Across human-modified  
404 landscapes, large groups of capybaras have been linked to increased crop damage [14]  
405 and vehicle collisions [15], as well as public health issues related to BSF spread [16].

406         Our results showed clear distinctions between habitat selection of capybaras in  
407 natural and human-modified landscapes, providing a background for further investigation  
408 into the potential indirect effects of human disturbance in capybara space use. The  
409 development of knowledge regarding these effects may assist future management actions  
410 aimed at reducing conflicts linked to the species, including those related to Brazilian  
411 spotted fever (BSF) spread.

412

## 413 **Conclusions**

414         Through the use of GPS tracking and resource selection functions it was possible  
415 to demonstrate variation in habitat selection strategies of capybaras across natural and  
416 human-modified landscapes. Forested habitats were more used through human-modified  
417 landscapes than across natural landscapes. In addition, capybaras consistently selected  
418 areas near water in both landscapes, but this resource was more important in predicting

419 capybara habitat selection in natural landscapes. In contrast, grasses/shrubs (which  
420 includes crops and pasture fields) was a stronger predictor of capybara habitat selection  
421 across human-modified landscapes. Our results show the influence of anthropic  
422 disturbance in capybara space use patterns. The understanding of capybara habitat use in  
423 natural and human-modified landscapes may support human-wildlife conflict  
424 management and Brazilian spotted fever spread control.

425

## 426 **Acknowledgments**

427 We are grateful to SESC Pantanal, UFMT, Embrapa Pantanal and Alegria and São  
428 José ranches (Corumbá) for logistical support during field work in the Brazilian Pantanal  
429 and to the “Departamento de Água e Esgoto de Americana (DAE)” for allowing us to  
430 work at the “Estação de Tratamento de Esgoto (ETE) de Carioba” in Americana  
431 municipality. Forestry Institute and Coordination of Urban Parks of the São Paulo State  
432 Secretariat for the Environment offered logistical support in captures and monitoring  
433 (SMA Process 000.409/2015). We are also very grateful to GIS Lab at Smithsonian  
434 Institution, VA, USA, for the technical training in GIS and spatial analysis.

435

## 436 **References**

- 437 1. Kokko H, López-Sepulcre A. From individual dispersal to species ranges:  
438 perspectives for a changing world. *Science*. 2006; 313: 789-791.
- 439 2. Tablado Z, Jenni L. Determinants of uncertainty in wildlife responses to human  
440 disturbance. *Biol Rev*. 2015; 92: 216-233.

- 441 3. Gaynor KM, Hojnowski CE, Carter NH, Brashares JS. The influence of human  
442 disturbance on wildlife nocturnality. *Science*. 2018; 360: 1232-1235.
- 443 4. Van der Ree R, Jaeger JA, Van der Grift E, Cleverger A. Effects of roads and  
444 traffic on wildlife populations and landscape function: road ecology is moving  
445 toward larger scales. *Ecol Soc*. 2011; 16: 1-9.
- 446 5. Stabach JA, Wittemyer G, Boone RB, Reid RS, Worden JS. Variation in habitat  
447 selection by white-bearded wildebeest across different degrees of human  
448 disturbance. *Ecosphere*. 2016; 7: 1-17.
- 449 6. Tucker MA, Böhning-Gaese K, Fagan WF, Fryxell JM, Van-Moorter B, Alberts  
450 SC, Mueller T. Moving in the Anthropocene: Global reductions in terrestrial  
451 mammalian movements. *Science*. 2018; 359: 466-469.
- 452 7. Kays R, Crofoot MC, Jetz W, Wikelski M. Terrestrial animal tracking as an eye  
453 on life and planet. *Science*. 2015; 348: 1222-1231.
- 454 8. McMahon BJ, Morand S, Gray JS. Ecosystem change and zoonoses in the  
455 Anthropocene. *Zoonoses Public Hlth*. 2018; 65: 755-765.
- 456 9. Nowak RM, Walker EP. *Walker's Mammals of the World (Vol. 1)*. 6th ed.  
457 Baltimore: Johns Hopkins University Press; 1999.
- 458 10. Vargas FC, Vargas SC, Moro MEG, Silva V, Carrer CRO. Monitoramento  
459 populacional de capivaras (*Hydrochoerus hydrochaeris* Linnaeus, 1766) em  
460 Pirassununga, SP, Brasil. *Ciênc Rural*. 2007; 37: 1104-1108.
- 461 11. Moreira JR, Alvarez MR, Tarifa T, Pacheco V, Taber A, Tirira DG, et al.  
462 Taxonomy, natural history and distribution of the capybara. In: Moreira JR, Ferraz  
463 KMPMB, Herrera EA, Macdonald DW, editors. *Capybara: Biology, Use and  
464 Conservation of an Exceptional Neotropical Species*. New York: Springer; 2013.  
465 pp. 3-37.

- 466 12. Corriale MJ, Herrera EA. Patterns of habitat use and selection by the capybara  
467 (*Hydrochoerus hydrochaeris*): a landscape-scale analysis. *Ecol Res.* 2014; 29:  
468 191-201.
- 469 13. Ferraz KMPMB, Ferraz SFB, Moreira JR, Couto HTZ, Verdade LM. Capybara  
470 (*Hydrochoerus hydrochaeris*) distribution in agroecosystems: a cross-scale  
471 habitat analysis. *J Biogeogr.* 2007; 34: 223-230.
- 472 14. Moreira JR, Pinheiro MS. Capybara production in Brazil: Captive breeding or  
473 sustainable management? In: Moreira JR, Ferraz KMPMB, Herrera EA,  
474 Macdonald DW, editors. *Capybara: Biology, Use and Conservation of an*  
475 *Exceptional Neotropical Species.* New York: Springer; 2013. pp. 333-344.
- 476 15. Abra FD, Granziera BM, Huijser MP, Ferraz KMPMB, Haddad CM, Paolino RM.  
477 Pay or prevent? Human safety, costs to society and legal perspectives on animal-  
478 vehicle collisions in São Paulo state, Brazil. *Plos One.* 2019. doi:  
479 10.1371/journal.pone.0215152.
- 480 16. Labruna MB. Brazilian spotted fever: the role of capybaras. In: Moreira JR, Ferraz  
481 KMPMB, Herrera EA, Macdonald DW, editors. *Capybara: Biology, Use and*  
482 *Conservation of an Exceptional Neotropical Species.* New York: Springer; 2013.  
483 pp. 371-383.
- 484 17. Souza CE, Moraes-Filho J, Ogrzewalska M, Uchoa FC, Horta MC, Souza SS, et  
485 al. Experimental infection of capybaras *Hydrochoerus hydrochaeris* by *Rickettsia*  
486 *rickettsii* and evaluation of the transmission of the infection to ticks *Amblyomma*  
487 *cajennense*. *Vet Parasitol.* 2009; 161: 116-121.
- 488 18. Costa FB, Gerardi M, Binder LDC, Benatti HR, Serpa MCDA, Lopes B, et al.  
489 *Rickettsia rickettsii* (Rickettsiales: Rickettsiaceae) infecting *Amblyomma*

- 490 *sculptum* (Acari: Ixodidae) ticks and capybaras in a Brazilian spotted fever-  
491 endemic area of Brazil. J Med Entomol. 2020: 57; 308-311.
- 492 19. Luz HR, Costa FB, Benatti HR, Ramos VN, Serpa MCA, Martins TF, et al.  
493 Epidemiology of capybara-associated Brazilian spotted fever. Plos Neglect Trop  
494 D. 2019. doi: 10.1371/journal.pntd.0007734.
- 495 20. Waterman JO, Campbell LAD, Maréchal L, Pilot M, Majolo B. Effect of human  
496 activity on habitat selection in the endangered Barbary macaque. Anim Conserv.  
497 2019. doi: 10.1111/acv.12543.
- 498 21. Herrera EA. Capybara Social Behavior and Use of Space: Patterns and Processes.  
499 In: Moreira JR, Ferraz KMPMB, Herrera EA, Macdonald DW, editors. Capybara:  
500 Biology, Use and Conservation of an Exceptional Neotropical Species. New  
501 York: Springer; 2013. pp. 195-207.
- 502 22. Venter O, Sanderson EW, Magrath A, Allan JR, Beher J, Jones KR, et al. Last of  
503 the Wild Project, Version 3 (LWP-3): 2009 Human Footprint, 2018 Release.  
504 Palisades, New York: NASA Socioeconomic Data and Applications Center  
505 (SEDAC). 2018. doi: 10.7927/H46T0JQ4.
- 506 23. Herrera EA. Growth and dispersal of capybaras (*Hydrochoerus hydrochaeris*) in  
507 the Llanos of Venezuela. J Zool. 1992; 228: 307-316.
- 508 24. QGIS. An Open Source Geographic Information System. QGIS. 2017.
- 509 25. IBGE. População nos Censos Demográficos, segundo Grandes Regiões, as  
510 Unidades da Federação e a situação do domicílio – 1960/2010. 2010 [Cited 2018  
511 March 25]. Available from:  
512 <https://censo2010.ibge.gov.br/sinopse/index.php?dados=8>

- 513 26. Alho CJ, Rondon NL. Habitats, population densities, and social structure of  
514 capybaras (*Hydrochaeris hydrochaeris*, Rodentia) in the Pantanal, Brazil. Rev  
515 Bras Zool. 1987; 4: 139-149.
- 516 27. Silva MPD, Mauro R, Mourao G, Coutinho M. Distribuição e quantificação de  
517 classes de vegetação do Pantanal através de levantamento aéreo. Rev Bras Bot.  
518 2000; 23: 143-152.
- 519 28. Swartz FA. The Pantanal in the 21st century — for the planet’s largest wetland,  
520 an uncertain future. In: Swartz, FA, editor. The Pantanal of Brazil, Paraguay and  
521 Bolivia. Pennsylvania: Hudson MacArthur Publishers. 2000. pp. 1-24.
- 522 29. Harris MB, Tomas W, Mourao G, Silva CJ, Guimaraes E, Sonoda F, Fachim E.  
523 Safeguarding the Pantanal wetlands: threats and conservation initiatives. Conserv  
524 Biol. 2005; 19: 714-720.
- 525 30. Tortato FR, Layme VMG, Crawshaw PG, Izzo TJ. The impact of herd  
526 composition and foraging area on livestock predation by big cats in the Pantanal  
527 of Brazil. Anim Conserv. 2015; 18: 539–547.
- 528 31. Metzger JP. Landscape structure changes and species richness in forest fragments  
529 of south-east Brazil. C R Acad Sci III. 1998; 4: 319-333.
- 530 32. Costa-Neto JDB, Maretti CC, Lino CF, Albuquerque JLR. A Reserva da Biosfera  
531 da Mata Atlântica no Estado de São Paulo. 2nd ed. São Paulo: Conselho Nacional  
532 da Reserva da Biosfera da Mata Atlântica; 1996.
- 533 33. Bressan PM, Kierulff MCM, Sugieda AM. Fauna Ameaçada de Extinção no  
534 Estado de São Paulo: Vertebrados. 1st ed. São Paulo: Fundação Parque Zoológico  
535 de São Paulo, Secretaria do Meio Ambiente; 2009.
- 536 34. Nishiyama SM, Pompermayer LG, de Lavor MSL, Mata LBSC. Associação  
537 cetamina-xilazina, tiletamina-zolazepam e tiletaminazolazepam-



- 538 levomepromazina na anestesia de capivara (*Hydrochoerus hydrochaeris*). Ceres.  
539 2006; 53: 406-412.
- 540 35. Pereira HDFA, Eston MR. Biologia e manejo de capivaras (*Hydrochoerus*  
541 *hydrochaeris*) no parque estadual Alberto Löfgren, São Paulo, Brasil. Rev Inst  
542 Florest. 2007; 19: 55-64.
- 543 36. Herrera EA, Macdonald DW. Aggression, dominance, and mating success among  
544 capybara males (*Hydrochaeris hydrochaeris*). Behav Ecol. 1993; 4: 114-119.
- 545 37. Garcias FM, Bager A. Estrutura populacional de capivaras na Estação Ecológica  
546 do Taim, Brasil, RS. Cienc Rural. 2009; 39: 1-7.
- 547 38. Herrera EA, Salas V, Congdon ER, Corriale MJ, Tang-Martínez Z. Capybara  
548 social structure and dispersal patterns: variations on a theme. J Mammal. 2011;  
549 92: 12-20.
- 550 39. Lewis JS, Rachlow JL, Garton EO, Vierling LA. Effects of habitat on GPS collar  
551 performance: using data screening to reduce location error. J Appl Ecol. 2007; 44:  
552 663-671.
- 553 40. Morellet N, Verheyden H, Angibault JM, Cargnelutti B, Lourtet B, Hewison MA.  
554 The effect of capture on ranging behaviour and activity of the European roe deer  
555 *Capreolus capreolus*. Wildlife Biol. 2009; 15: 278-287.
- 556 41. Bivand R, Lewin-Koh N. mapproj: Tools for reading and handling spatial  
557 objects. R package version 0.8; 2013.
- 558 42. R Core Team. R: A language and environment for statistical computing. R  
559 Foundation for Statistical Computing; 2013.
- 560 43. Gislason PO, Benediktsson JA, Sveinsson JR. Random forests for land cover  
561 classification. Pattern Recogn Lett. 2006; 27: 294-300.

- 562 44. Leutner B, Horning N. RStoolbox: Tools for Remote Sensing Data Analysis. R  
563 Package version 0.1; 2016.
- 564 45. Lu D, Weng Q. A survey of image classification methods and techniques for  
565 improving classification performance. *Int J Remote Sens.* 2007; 28: 823-870.
- 566 46. Tucker CJ, Sellers PJ. Satellite remote sensing of primary production. *Int J*  
567 *Remote Sens.* 1986; 7: 1395-1416.
- 568 47. Johnson DH. The comparison of usage and availability measurements for  
569 evaluating resource preference. *Ecology.* 1980; 61: 65-71.
- 570 48. Manly BFJ, McDonald LL, Thomas DL, McDonald TL, Erickson WP. Resource  
571 selection by animals: statistical analysis and design for field studies. 2nd ed.  
572 Massachusetts: Springer; 2002.
- 573 49. Barreto GR, Quintana RD. Foraging strategies and feeding habits of capybaras.  
574 In: Moreira JR, Ferraz KMPMB, Herrera EA, Macdonald DW, editors. *Capybara:*  
575 *Biology, Use and Conservation of an Exceptional Neotropical Species.* New  
576 York: Springer; 2013. pp. 83-96.
- 577 50. Northrup JM, Hooten MB, Anderson CR, Wittemyer G. Practical guidance on  
578 characterizing availability in resource selection functions under a use–availability  
579 design. *Ecology.* 2013; 94: 1456-1463.
- 580 51. Gillies CS, Hebblewhite M, Nielsen SE, Krawchuk MA, Aldridge CL, Frair JL,  
581 et al. Application of random effects to the study of resource selection by animals.  
582 *J Anim Ecol.* 2006; 75: 887-898.
- 583 52. Bates D, Maechler M, Bolker B, Walker S. lme4: Linear mixed-effects models  
584 using Eigen and S4. R package version 0.1; 2014.
- 585 53. Burnham KP, Anderson DR. Model selection and multimodel inference: a  
586 practical information-theoretic approach. 2nd ed. New York: Springer; 2002.

- 587 54. Boyce MS, Vernier PR, Nielsen SE, Schmiegelow FK. Evaluating resource  
588 selection functions. *Ecol Model.* 2002; 157: 281-300.
- 589 55. Frid A, Dill L. Human-caused disturbance stimuli as a form of predation risk.  
590 *Conserv Ecol.* 2002; 6: 1-16.
- 591 56. Barbieri ARM, Szabó MPJ, Costa FB, Martins TM, Soares HS, Pascoli B, et al.  
592 Species richness and seasonal dynamics of ticks with notes on rickettsial infection  
593 in a Natural Park of the Cerrado biome in Brazil. *Ticks Tick-borne Dis.* 2019; 10:  
594 442-453.
- 595 57. Szabó MP, Olegário MMM, Santos ALQ. Tick fauna from two locations in the  
596 Brazilian savannah. *Exp Appl Acarol.* 2007; 43: 73-84.
- 597 58. Polo G, Acosta CM, Labruna MB, Ferreira F. Transmission dynamics and control  
598 of *Rickettsia rickettsii* in populations of *Hydrochoerus hydrochaeris* and  
599 *Amblyomma sculptum*. *PLoS Neglect Trop D.* 2017. doi:  
600 10.1371/journal.pntd.0005613.0
- 601 59. Polo G, Acosta CM, Labruna MB, Ferreira F, Brockmann D. Hosts mobility and  
602 spatial spread of *Rickettsia rickettsii*. *Plos Comput Biol.* 2018. doi:  
603 10.1371/journal.pcbi.1006636.
- 604 60. Campos-Krauer JM, Wisely SM, Benitez IK, Robles V, Golightly RT. Rango de  
605 Hogar y uso de Hábitat de Carpinchos en Pastizales recién invadido en el Chaco  
606 Seco de Paraguay. *Therya.* 2014; 5: 61-79.
- 607 61. Rocha VJ, Sekiama ML, Gonçalves DD, Sampieri BR, Barbosa GP, Dias TC, et  
608 al. Capybaras (*Hydrochoerus hydrochaeris*) and the presence of ticks  
609 (*Amblyomma sculptum*) at the UFSCar Araras campus, São Paulo. *Cienc Anim*  
610 *Bras.* 2017; 18: 1-15.

611 62. Polo G, Labruna MB, Ferreira F. Satellite Hyperspectral Imagery to Support Tick-  
612 Borne Infectious Diseases Surveillance. Plos One. 2015; 10: 1-12.

613

## 614 **Supporting information captions**

615 **S1 Appendix. Land cover classification of capybara habitats.** Methods on how  
616 habitats of studied capybaras were classified using high-resolution satellite imagery and  
617 random forest algorithm.

618 **Appendix S2. Sensitivity Analysis performed for study areas across natural and**  
619 **human-modified landscapes.** We performed sensitivity analysis to set the number of  
620 random points per ‘use’ point to our habitat selection models.

621 **Appendix S3. Top-ranked models’ evaluation.** We used presence-only data to evaluate  
622 our top-ranked models’ performance through Spearman rank correlations between area-  
623 adjusted frequencies and resource selection functions spatial bins.

624 **Table S1. Summary table for GPS-tracked capybaras across natural and human-**  
625 **modified landscapes.**



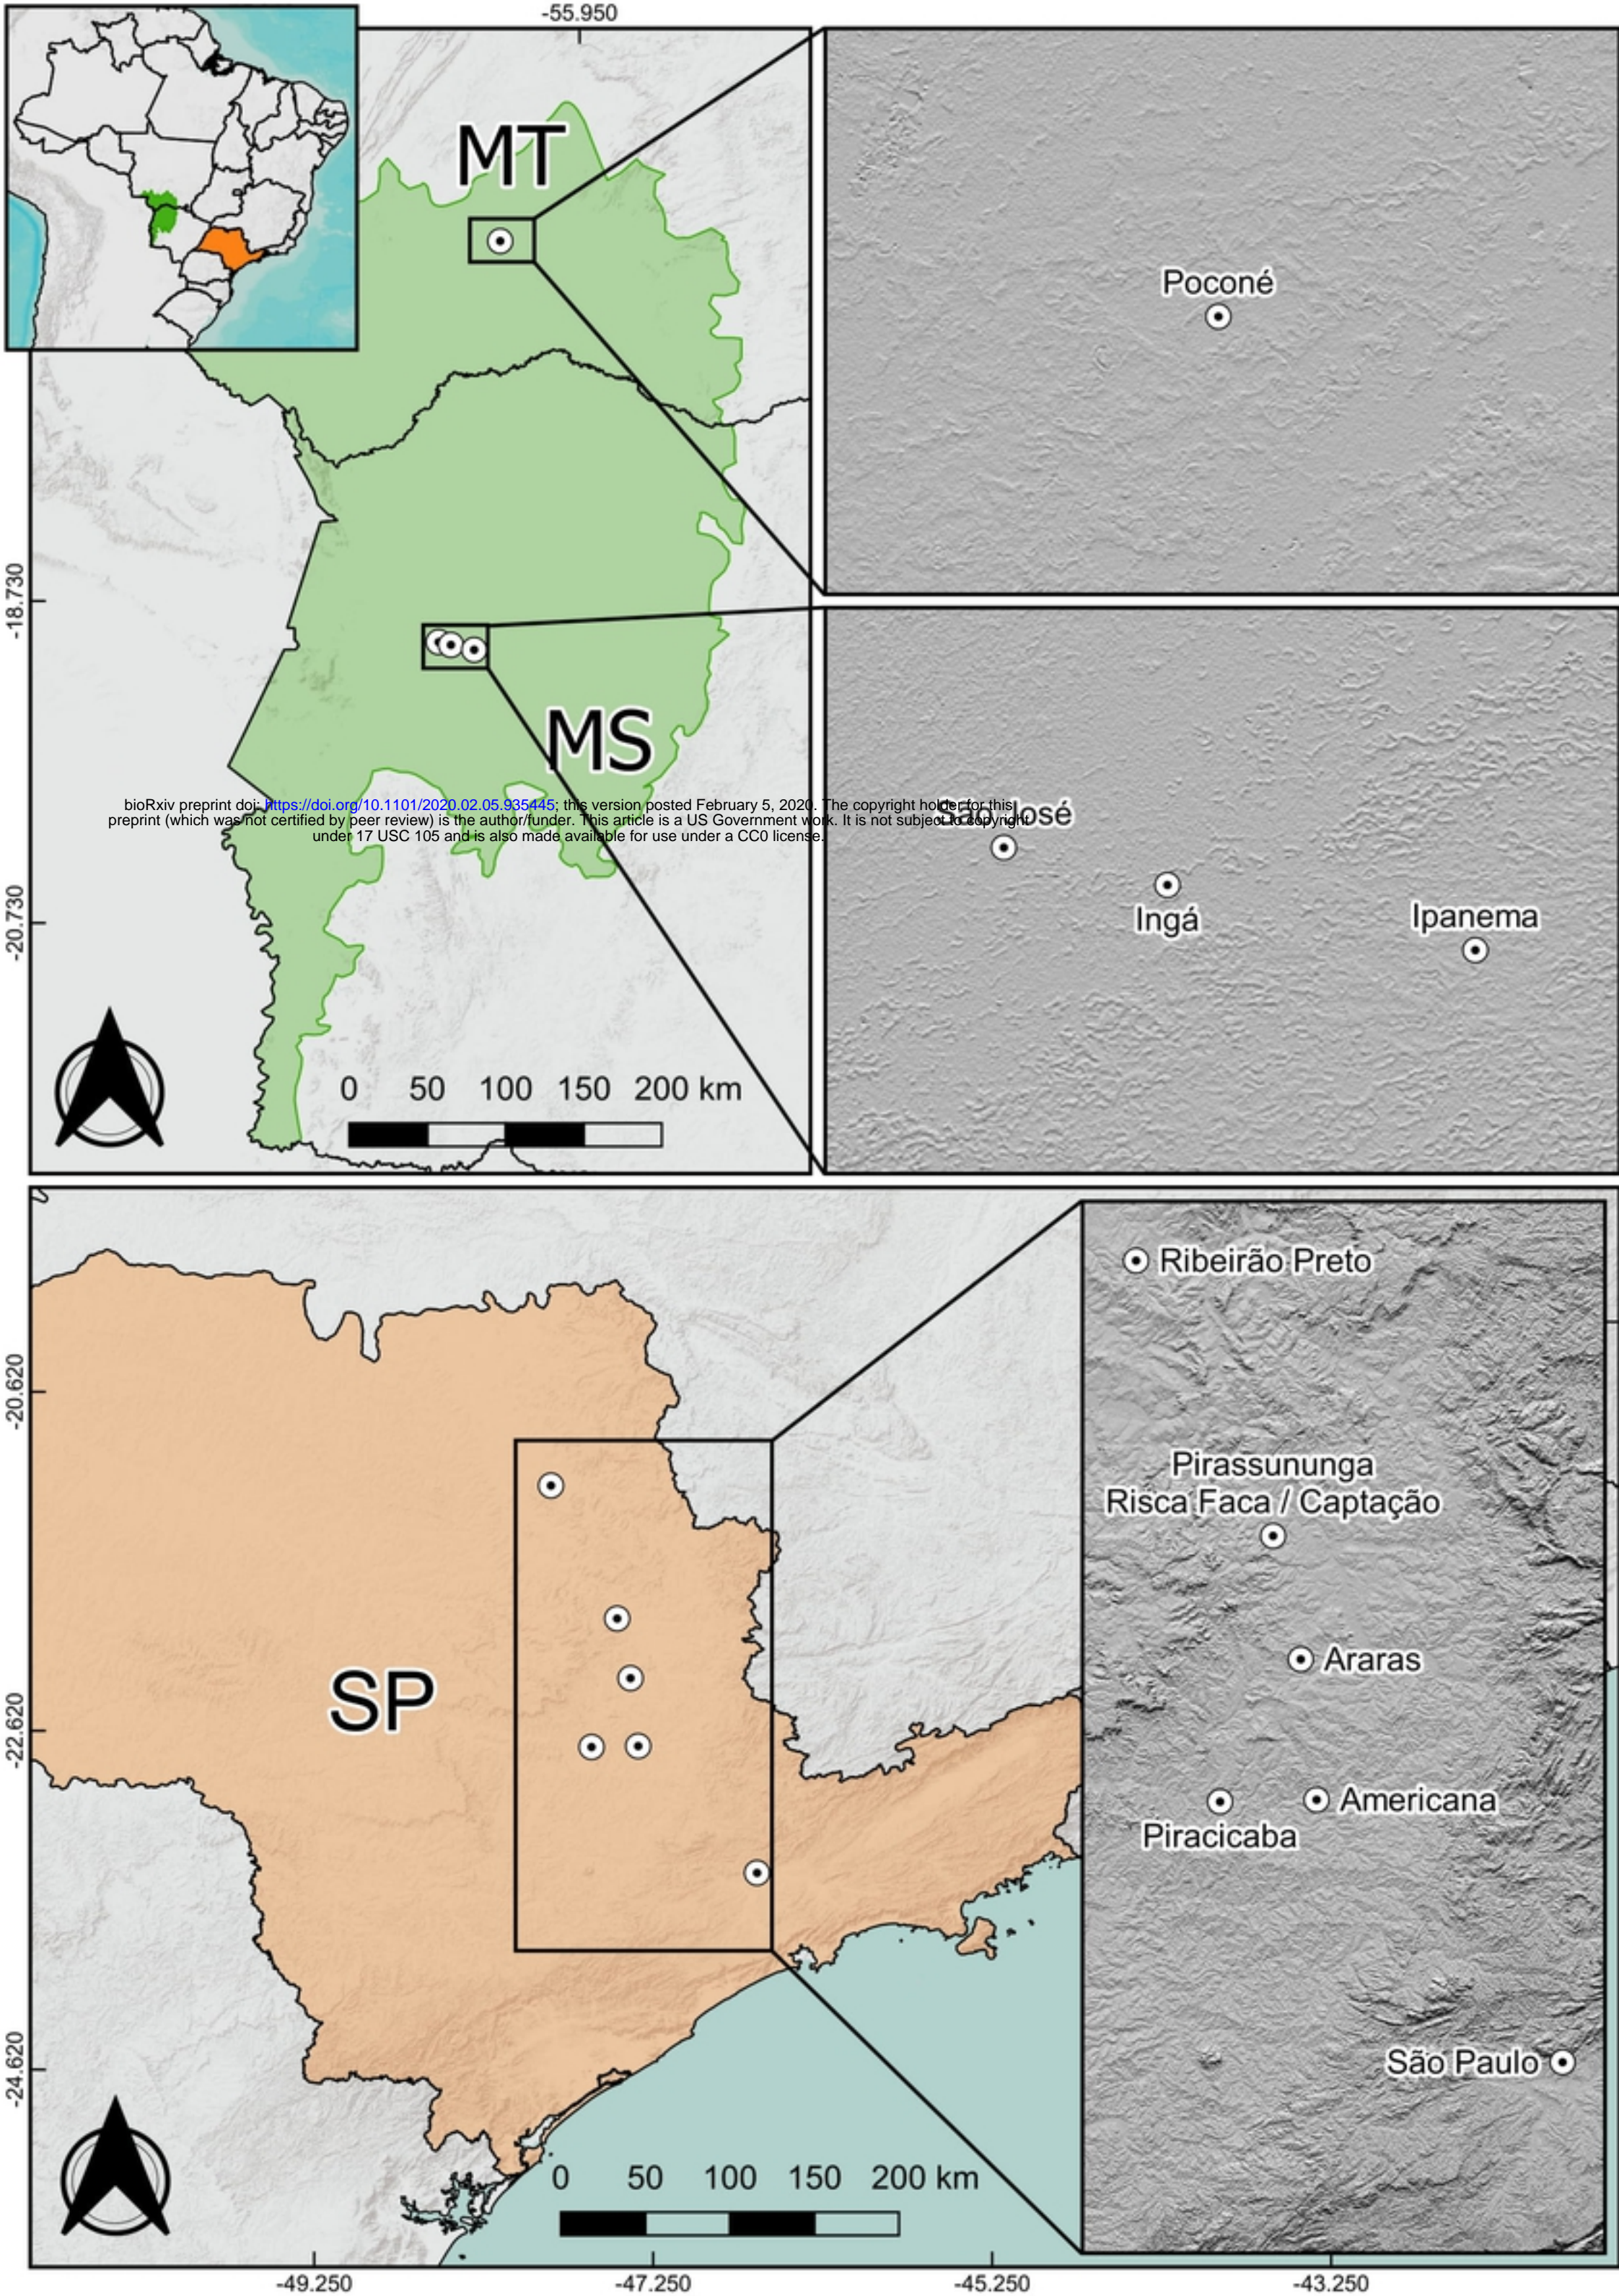

Fig 1



### Distance to Forest Interior (Day)

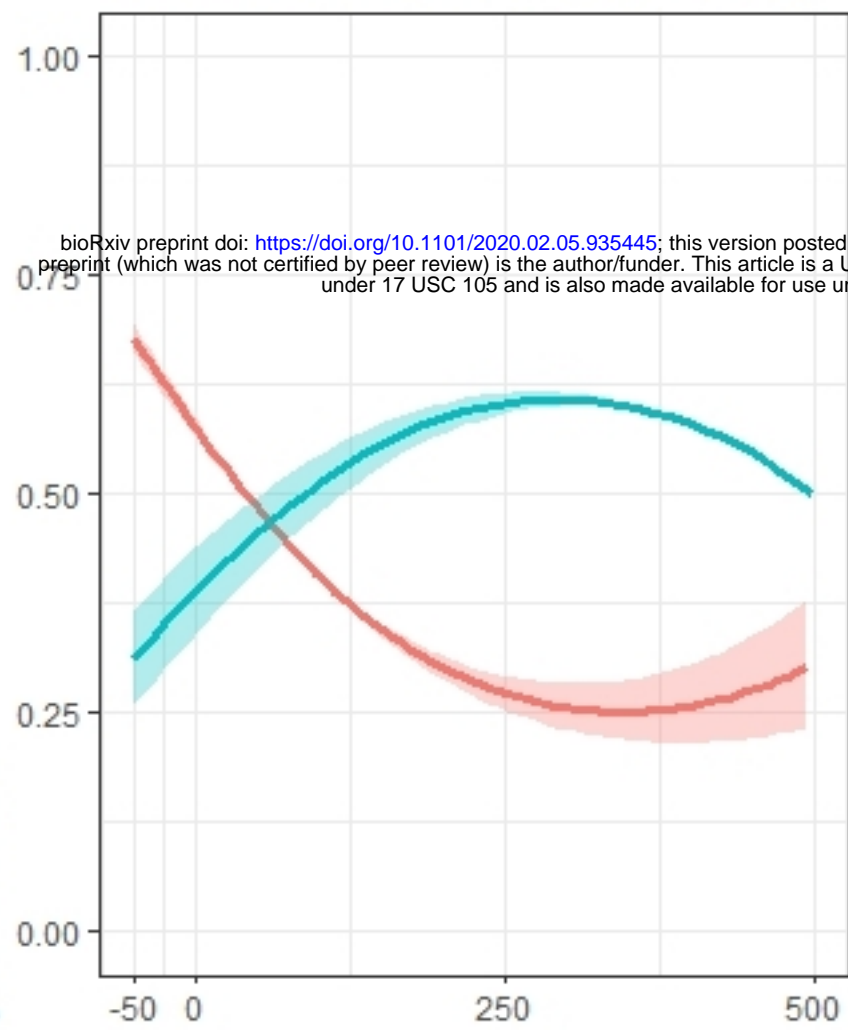

### Distance to Forest Interior (Night)

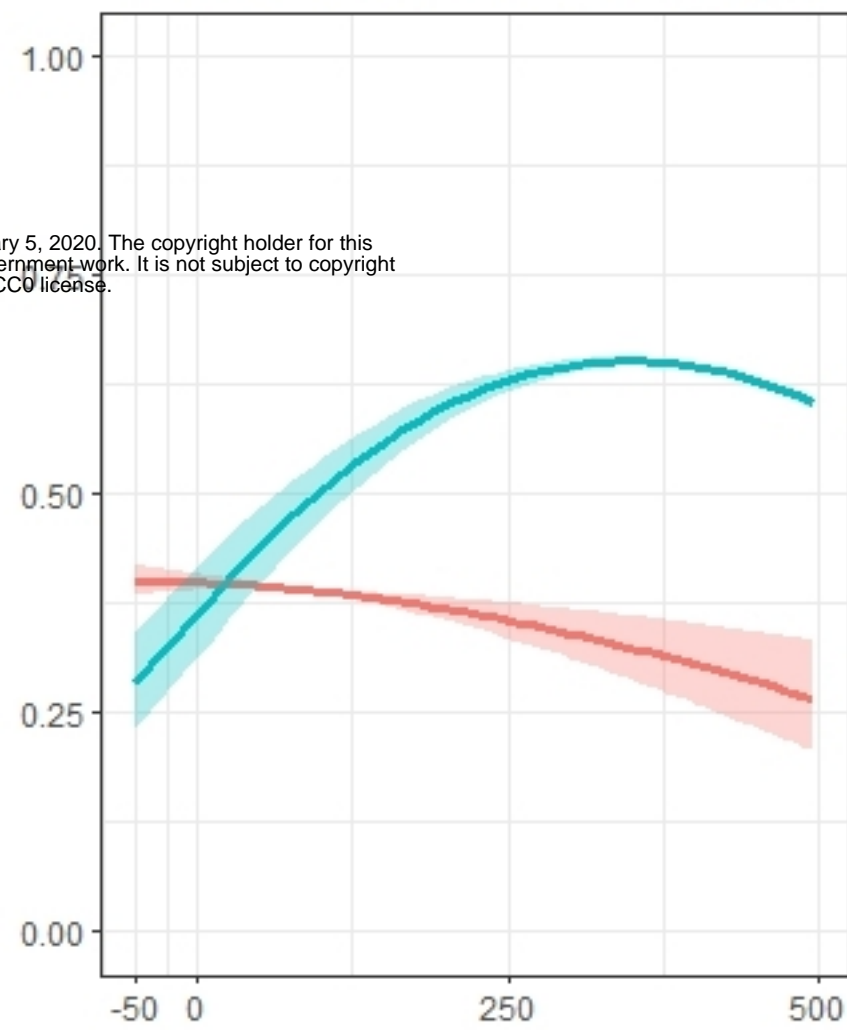

### Distance to Water (Day)

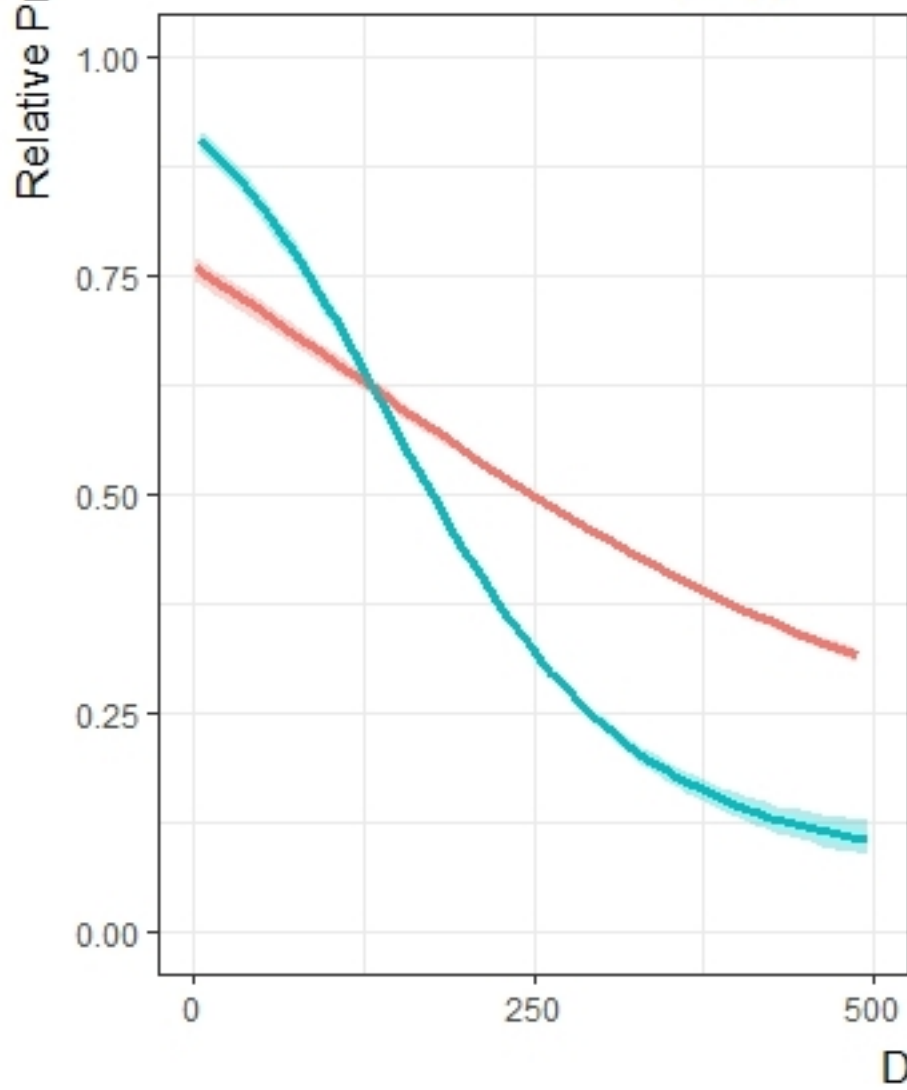

### Distance to Water (Night)

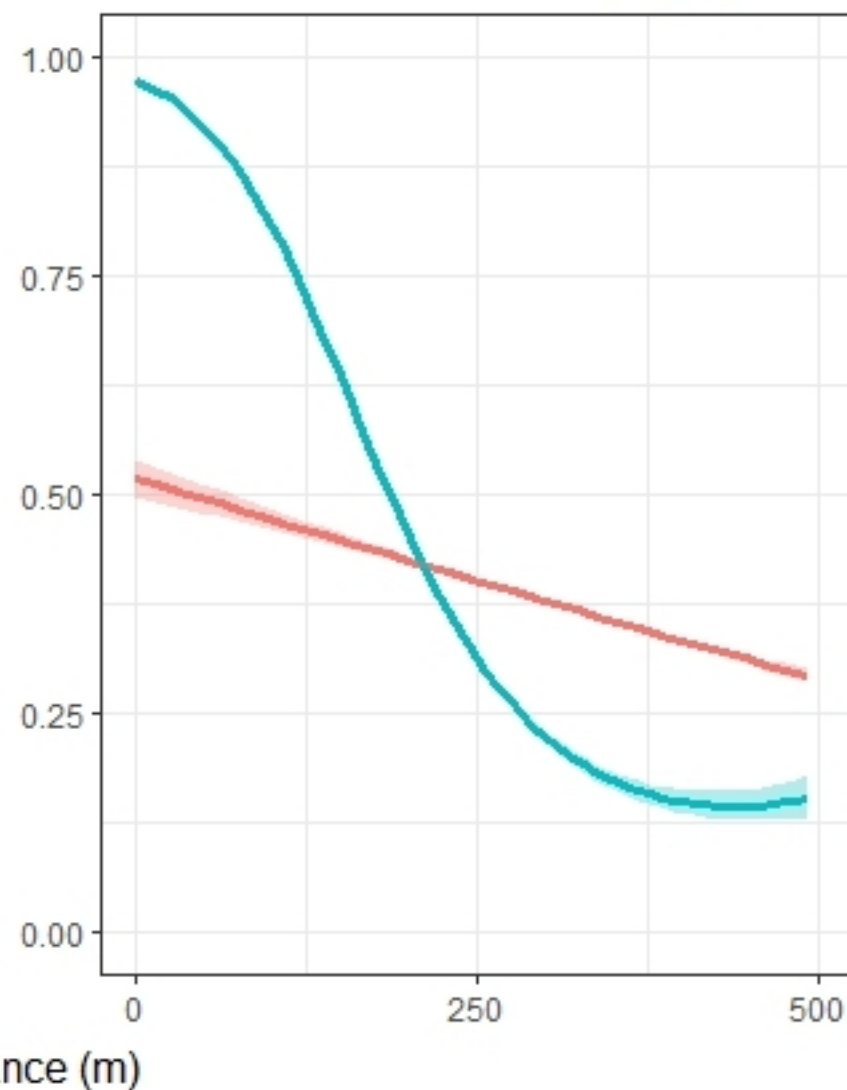

Landscape

- HMLs
- NLs

bioRxiv preprint doi: <https://doi.org/10.1101/2020.02.05.935445>; this version posted February 5, 2020. The copyright holder for this preprint (which was not certified by peer review) is the author/funder. This article is a US Government work. It is not subject to copyright under 17 USC 105 and is also made available for use under a CC0 license.

Fig 2

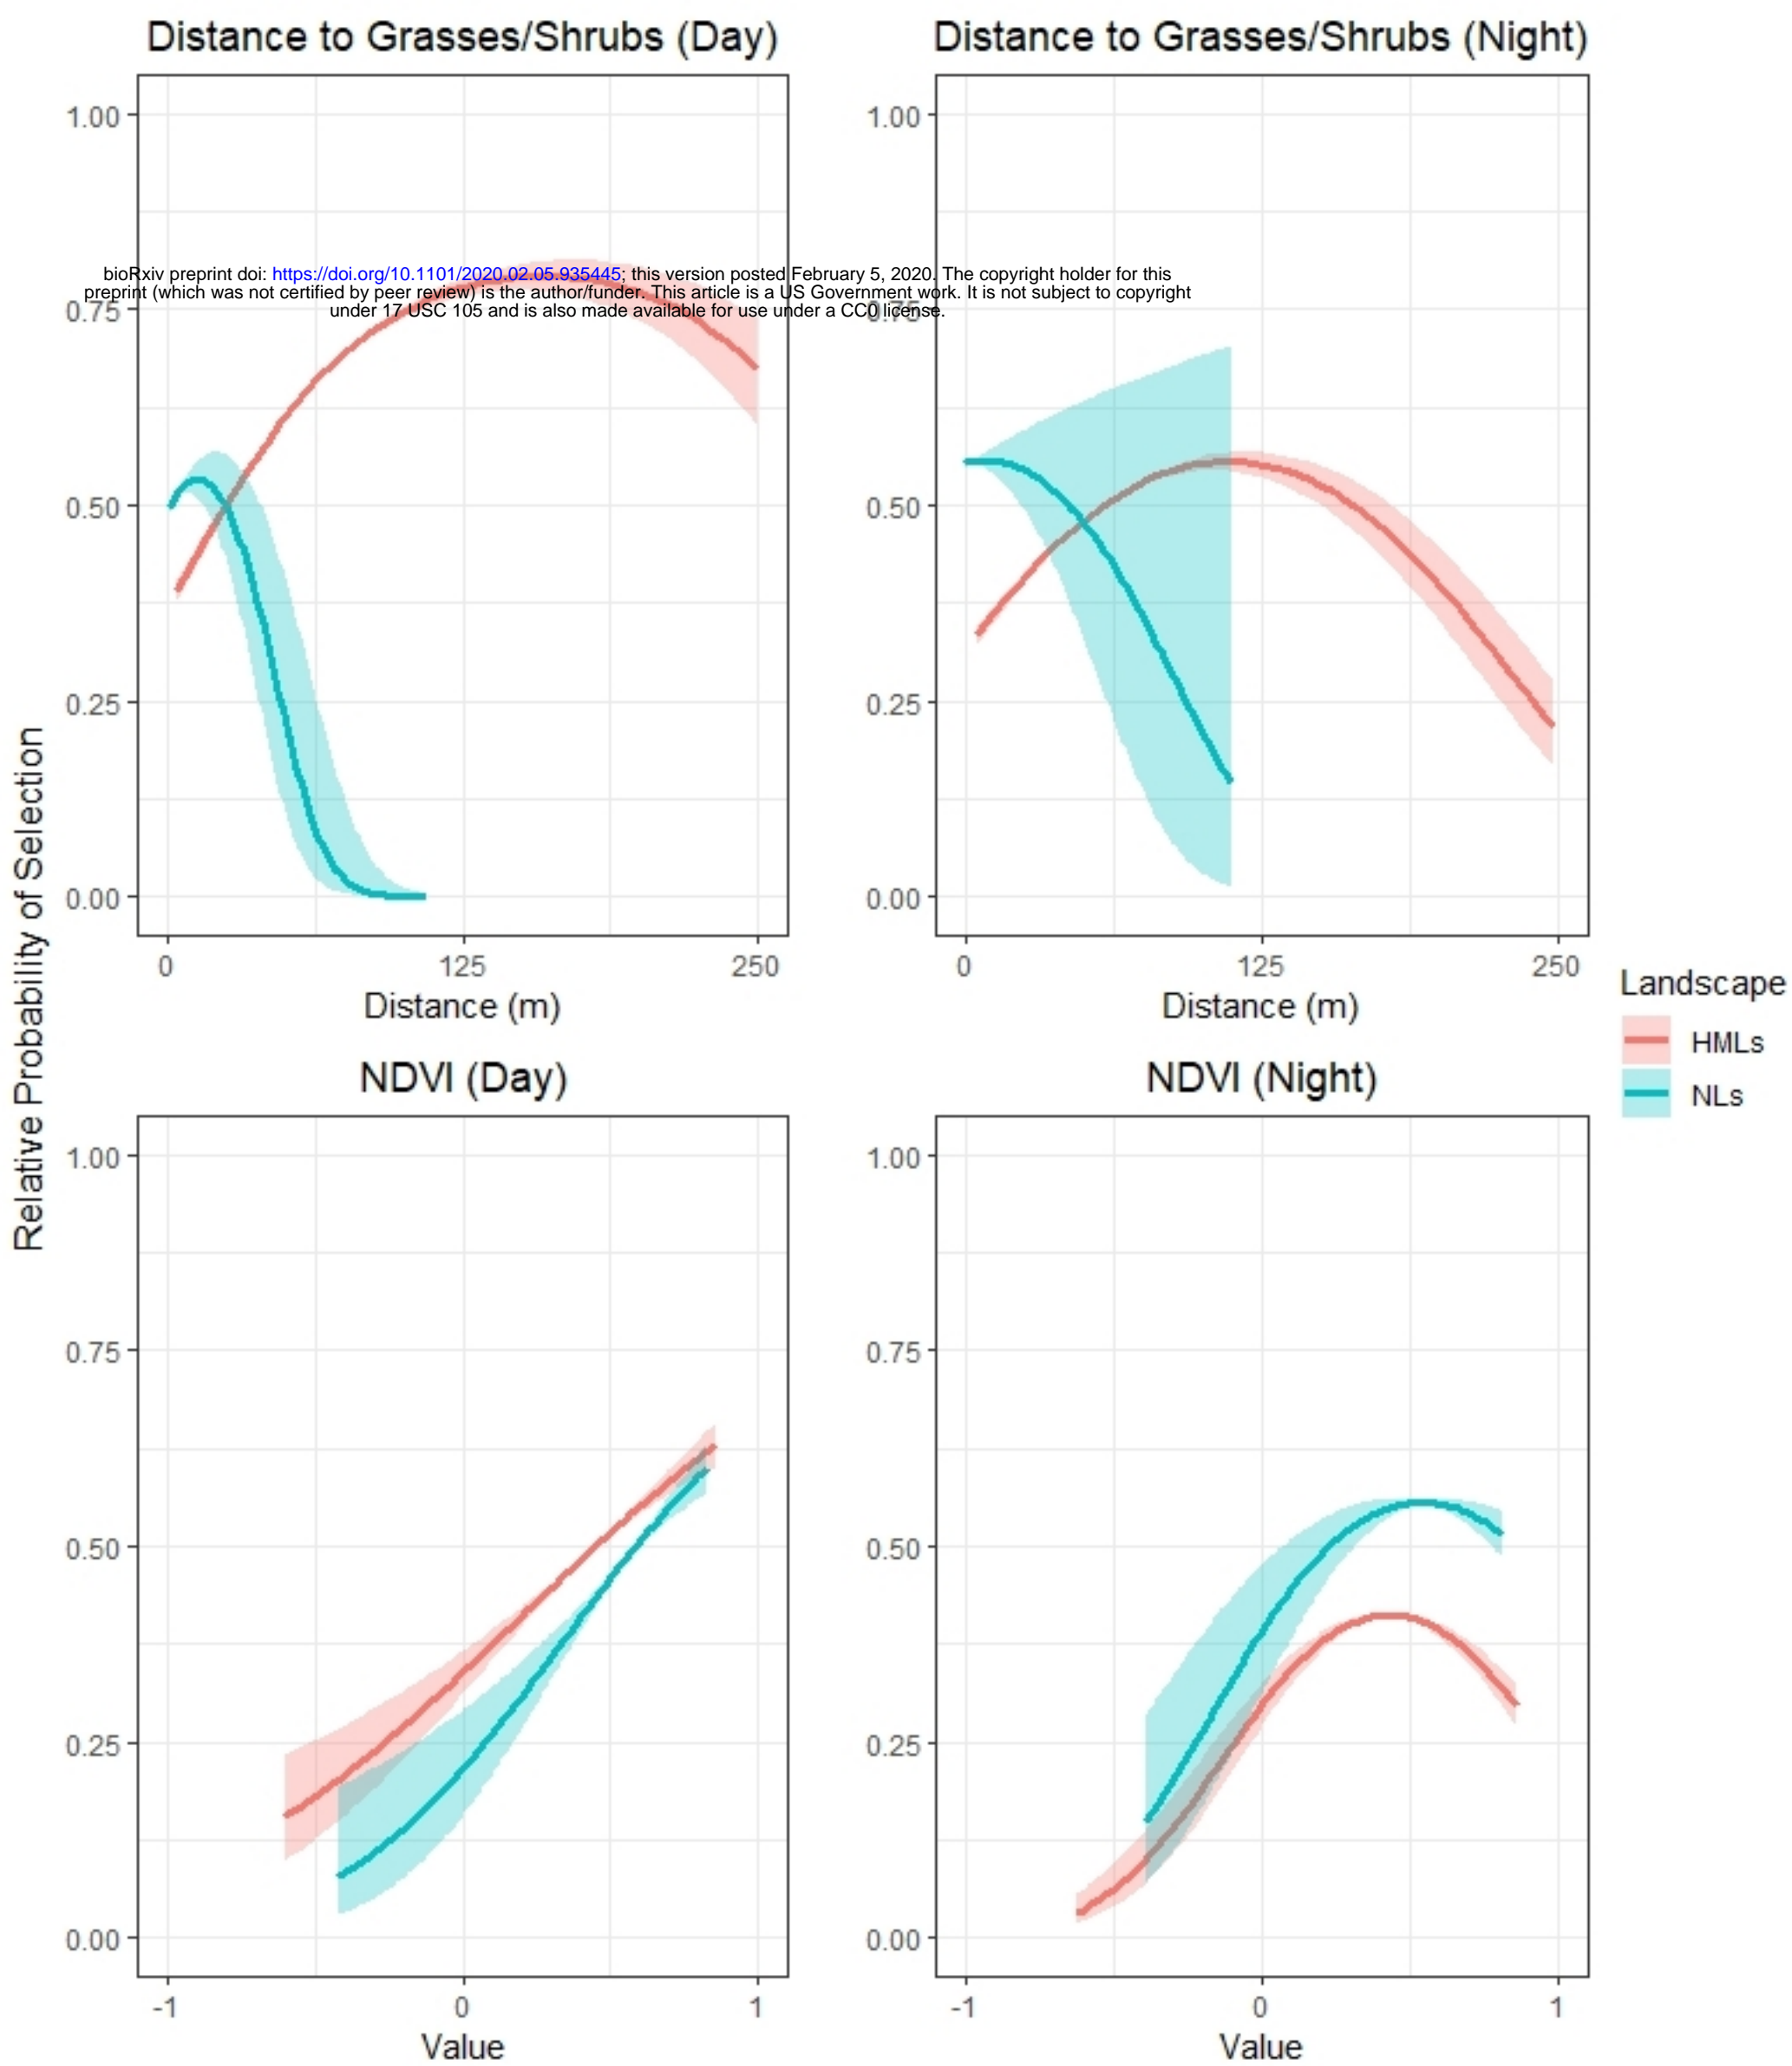

Fig 3
